# Supplementary material
Source: PubMed Central journal article supplement (PMC10270732)
Supplement: mmc1.pdf [file mmc1.pdf]

## **Table S1. Search strategy**

### **MEDLINE 1946 to October 17, 2022**

- 1 exp renal insufficiency, chronic/ or exp kidney failure, chronic/
- 2 chronic kidney disease.tw.
- 3 kidney condition.tw.
- 4 exp Renal Replacement Therapy/ or exp Renal Dialysis/ or exp Kidney Transplantation/
- 5 renal dialysis/ or exp haemodialysis, home/ or exp peritoneal dialysis/
- 6 dialysis.tw.
- 7 (haemodialysis or haemodialysis).tw.
- 8 peritoneal dialysis.tw.
- 9 end stage renal disease.tw.
- 10 kidney transplant recipient.tw.
- 11 1 or 2 or 3 or 4 or 5 or 6 or 7 or 8 or 9 or 10
- 12 covid\$.tw.
- 13 coronavirus\$.tw.
- 14 12 or 13
- 15 11 and 14
- 16 grounded theory/ or exp qualitative research/
- 17 interview\$.tw.
- 18 Focus group\$.tw.
- 19 Thematic\$.tw.
- 20 Qualitative\$.tw.

- 21 Grounded theory.tw.
- 22 Phenomenol\$.tw.
- 23 exp Knowledge/ or exp Health Knowledge, Attitudes, Practice/
- 24 exp Psychology, Social/
- 25 exp "Quality of Life"/
- 26 16 or 17 or 18 or 19 or 20 or 21 or 22 or 23 or 24 or 25
- 27 15 and 26

### **Embase 1974 to October 17, 2022**

- 1 exp renal insufficiency, chronic/ or exp kidney failure, chronic/
- 2 chronic kidney disease.tw.
- 3 kidney condition.tw.
- 4 exp Renal Replacement Therapy/ or exp Renal Dialysis/ or exp Kidney Transplantation/
- 5 renal dialysis/ or exp haemodialysis, home/ or exp peritoneal dialysis/
- 6 dialysis.tw.
- 7 (haemodialysis or haemodialysis).tw.
- 8 peritoneal dialysis.tw.
- 9 end stage renal disease.tw.
- 10 kidney transplant recipient.tw.
- 11 1 or 2 or 3 or 4 or 5 or 6 or 7 or 8 or 9 or 10
- 12 covid\$.tw.
- 13 coronavirus\$.tw.
- 14 12 or 13

15 11 and 14

16 grounded theory/ or exp qualitative research/

17 interview\$.tw.

18 Focus group\$.tw.

19 Thematic\$.tw.

20 Qualitative\$.tw.

21 Grounded theory.tw.

22 Phenomenol\$.tw.

23 exp Knowledge/ or exp Health Knowledge, Attitudes, Practice/

24 exp Psychology, Social/

25 exp "Quality of Life"/

26 16 or 17 or 18 or 19 or 20 or 21 or 22 or 23 or 24 or 25

27 15 and 26

28 limit 27 to (English language and yr.="2020 -Current")

**CINAHL to October 17, 2022**

- S23 S15 AND S20 limit to from 2020
- S22 S15 AND S20 Limit to English
- S21 S15 AND S20
- S20 S16 OR S17 OR S18 OR S19
- S19 "Patient experience"
- S18 "Patient perspective"
- S17 (MH "Semi-Structured Interview") OR (MH "Interview Guides") OR (MH "Unstructured Interview") OR (MH "Structured Interview") OR "interview"
- S16 (MH "Qualitative Studies+") OR "qualitative" OR (MH "Ethnological Research") OR (MH "Grounded Theory") OR (MH "Phenomenological Research")
- S15 S9 AND S14
- S14 S10 OR S11 OR S12 OR S13
- S13 (MH "Telehealth+") OR "covid-19 telehealth" OR (MH "Telemedicine+") OR (MH "Remote Consultation")
- S12 "COVID-19 outbreak"
- S11 (MH "Stay-at-Home Orders") OR "covid lockdown" OR (MH "SARS-CoV-2")
- S10 (MH "COVID-19") OR "covid-19" OR (MH "COVID-19 Vaccines") OR (MH "COVID-19 Pandemic")

- S9 S1 OR S2 OR S3 OR S4 OR S5 OR S6 OR S7 OR S8
- S8 "Renal transplantation" OR (MH "Kidney Transplantation+")
- S7 (MH "Kidney Transplantation+") OR "kidney transplantation" OR (MH "Pancreas-Kidney Transplantation")
- S6 (MH "Dialysis+") OR "dialysis" OR (MM "Dialysis Patients") OR (MM "Home Dialysis") OR (MH "Peritoneal Dialysis+")
- S5 (MH "Dialysis+") OR "dialysis" OR (MM "Dialysis Patients") OR (MM "Home Dialysis") OR (MH "Peritoneal Dialysis+")
- S4 (MH "Renal Replacement Therapy+") OR (MH "Continuous Renal Replacement Therapy+") OR (MH "Haemodialysis+") OR (MM "Home Dialysis") OR (MM "Kidney Transplantation") OR (MH "Peritoneal Dialysis+")
- S3 (MH "Kidney Failure, Chronic+") OR "end stage renal disease"
- S2 (MH "Kidney Failure, Chronic+") OR (MH "Renal Insufficiency, Chronic+") OR (MH "Kidney Diseases+") OR "chronic kidney disease"
- S1 (MH "Renal Insufficiency+") OR (MH "Kidney Transplantation+") OR (MH "Kidney Failure, Acute+") OR (MH "Pancreas-Kidney Transplantation") OR "kidney condition"

**Table S2. Comprehensiveness of reporting in included studies\***

| Item                                                    | Studies reporting each item                    | Number of studies |
|---------------------------------------------------------|------------------------------------------------|-------------------|
| <b>Personal Characteristics</b>                         |                                                |                   |
| Interviewer/facilitator identified                      | (1-13)                                         | 13                |
| Occupation                                              | (6-8, 10, 12-18)                               | 11                |
| Experience and training                                 | (6, 7, 10-12, 15, 18)                          | 7                 |
| <b>Relationship with participants</b>                   |                                                |                   |
| Relationship established before the study start         | (1, 4, 6, 7, 9, 11, 12, 16, 18-22)             | 13                |
| <b>Participant selection</b>                            |                                                |                   |
| Selection strategy                                      | (1-14, 17, 21-23)                              | 18                |
| Method of approach of recruitment                       | (1-13, 15-21, 24, 25)                          | 22                |
| Sample size                                             | (1-33)                                         | 33                |
| No. and/or reasons for nonparticipation                 | (2, 5, 7, 8, 10, 11, 15-17, 20, 21, 25, 33)    | 13                |
| <b>Setting</b>                                          |                                                |                   |
| Venue of data collection                                | (2-19, 21-25, 28, 33, 34)                      | 26                |
| Presence of non-participants (e.g. clinical staff)      | (16)                                           | 1                 |
| Description of sample                                   | (1-25, 30, 32, 33)                             | 28                |
| <b>Data collection</b>                                  |                                                |                   |
| Questions, prompts or topic guide                       | (1-3, 6-12, 15-17, 22, 24, 25)                 | 16                |
| Repeat interviews/observations                          | (1, 15, 33)                                    | 3                 |
| Audio/visual recording                                  | (1-3, 6-8, 10-13, 15, 17, 18, 22-25, 30, 32)   | 19                |
| Field notes                                             | (1-5, 10, 15, 17)                              | 8                 |
| Duration of data collection                             | (1-3, 6, 7, 10-12, 15-17, 22, 25)              | 13                |
| Translation and interpretation                          | (8, 10, 11, 13, 16, 20)                        | 6                 |
| Protocol for data preparation and transcription         | (1-3, 5, 9-12, 18, 21, 22, 24)                 | 12                |
| Data (or theoretical) saturation                        | (1-4, 10-13, 18, 22, 24)                       | 11                |
| <b>Data analysis</b>                                    |                                                |                   |
| Researcher/expert triangulation                         | (1, 3, 6, 7, 9-13, 15, 17, 18, 21, 22, 24, 25) | 16                |
| Translations                                            | (10, 13, 16)                                   | 3                 |
| Derivation of themes or findings                        | (1-13, 15-18, 21, 22, 24, 25)                  | 21                |
| Use of software                                         | (1-3, 10-12, 14, 15, 17, 18, 24, 25, 34)       | 13                |
| Member checking                                         | (10-13, 15, 17, 18, 21, 24)                    | 9                 |
| <b>Reporting</b>                                        |                                                |                   |
| Participant quotations or raw data provided             | (1-3, 5-7, 9-13, 15-18, 20-22, 24, 25, 30, 33) | 22                |
| Range of depth of insight into participant perspectives | (1-13, 15, 24, 25)                             | 16                |

\* Abstracts were not reported if data was not clearly reported.

**Table S3. COREQ appraisal**

| Item                                               | Antoun 2021 | Arevalo Iraheta 2021 * | Arevalo Iraheta 2022 | Beaude t 2022 ^ | Bonenk amp 2021 ^ | Cuevas - Budhart 2022 | Danton 2022 | Davis 2022 | Figueir edo 2021 * | Fortin 2021 * | Gordon 2022 * |
|----------------------------------------------------|-------------|------------------------|----------------------|-----------------|-------------------|-----------------------|-------------|------------|--------------------|---------------|---------------|
| <b>Personal Characteristics</b>                    |             |                        |                      |                 |                   |                       |             |            |                    |               |               |
| Interviewer/facilitator identified                 | Y           | -                      | N                    | N               | N                 | N                     | N           | N          | -                  | -             | -             |
| Occupation of the interview/facilitator            | N           | -                      | Y                    | Y               | N                 | N                     | N           | N          | Y                  | -             | -             |
| Experience or training in qualitative research     | N           | -                      | Y                    | N               | N                 | N                     | N           | N          | -                  | -             | -             |
| <b>Relationship with participants</b>              |             |                        |                      |                 |                   |                       |             |            |                    |               |               |
| Relationship established before study start        | Y           | -                      | N                    | Y               | Y                 | N                     | N           | N          | -                  | -             | -             |
| <b>Participant selection</b>                       |             |                        |                      |                 |                   |                       |             |            |                    |               |               |
| Selection strategy                                 | Y           | -                      | N                    | N               | N                 | N                     | N           | N          | Y                  | -             | -             |
| Method of approach or recruitment                  | Y           | -                      | Y                    | Y               | Y                 | Y                     | Y           | N          | -                  | -             | -             |
| Sample size                                        | Y           | Y                      | Y                    | Y               | Y                 | Y                     | Y           | Y          | Y                  | Y             | Y             |
| No. and/or reasons for nonparticipation            | N           | -                      | Y                    | Y               | Y                 | N                     | Y           | Y          | -                  | -             | -             |
| <b>Setting</b>                                     |             |                        |                      |                 |                   |                       |             |            |                    |               |               |
| Venue of data collection                           | N           | -                      | Y                    | Y               | N                 | Y                     | Y           | Y          | Y                  | -             | Y             |
| Presence of nonparticipants (e.g., clinical staff) | N           | -                      | N                    | Y               | N                 | N                     | N           | N          | -                  | -             | -             |
| Description of sample                              | Y           | -                      | Y                    | Y               | Y                 | Y                     | Y           | Y          | Y                  | -             | -             |
| <b>Data collection</b>                             |             |                        |                      |                 |                   |                       |             |            |                    |               |               |
| Questions, prompts or topic guide                  | Y           | -                      | Y                    | Y               | N                 | Y                     | Y           | N          | -                  | -             | -             |
| Repeat interviews/observations                     | Y           | -                      | Y                    | N               | N                 | N                     | N           | Y          | -                  | -             | -             |
| Audio/visual recording                             | Y           | -                      | Y                    | N               | N                 | Y                     | Y           | N          | -                  | -             | -             |
| Field notes                                        | Y           | -                      | Y                    | N               | N                 | N                     | N           | N          | -                  | -             | -             |
| Duration of data collection                        | Y           | -                      | Y                    | Y               | N                 | N                     | Y           | N          | -                  | -             | -             |
| Translation and interpretation                     | NA          | -                      | N                    | Y               | Y                 | N                     | NA          | NA         | -                  | -             | -             |
| Data preparation and transcription                 | Y           | -                      | N                    | N               | N                 | Y                     | N           | N          | -                  | -             | -             |
| Data (or theoretical) saturation                   | Y           | -                      | N                    | N               | N                 | Y                     | N           | N          | -                  | -             | -             |
| <b>Data Analysis</b>                               |             |                        |                      |                 |                   |                       |             |            |                    |               |               |

|                                                         |    |   |   |   |   |   |    |    |   |   |   |
|---------------------------------------------------------|----|---|---|---|---|---|----|----|---|---|---|
| Researcher/expert triangulation                         | Y  | - | Y | N | N | Y | Y  | N  | - | - | - |
| Translation                                             | NA | - | N | Y | N | N | NA | NA | - | - | - |
| Derivation of themes or findings                        | Y  | - | Y | Y | N | Y | Y  | N  | - | - | - |
| Use of software                                         | Y  | - | Y | N | N | Y | Y  | N  | Y | - | - |
| Member checking                                         | N  | - | Y | N | N | Y | N  | N  | - | - | - |
| <b>Reporting</b>                                        |    |   |   |   |   |   |    |    |   |   |   |
| Participant quotations or raw data provided             | Y  | - | Y | Y | Y | Y | Y  | Y  | - | - | - |
| Range of depth of insight into participant perspectives | Y  | - | Y | N | N | Y | Y  | N  | - | - | - |

\*Abstract only; - not all COREQ domains could be assessed for publications reported as abstract only; Y: yes; N: no; NA: not applicable.



| Item                                               | Guha 2021 | Haokip 2020 | Heyck Lee 2022 | Huuskes 2021 | John 2021 * | Kanavaki 2021* | Lunney 2021 | Malo 2022 | McKeaveney 2021 | McKeaveney 2022 | Ng 2021 * |
|----------------------------------------------------|-----------|-------------|----------------|--------------|-------------|----------------|-------------|-----------|-----------------|-----------------|-----------|
| <b>Personal Characteristics</b>                    |           |             |                |              |             |                |             |           |                 |                 |           |
| Interviewer/facilitator identified                 | Y         | N           | N              | Y            | -           | -              | Y           | Y         | Y               | N               | -         |
| Occupation of the interview/facilitator            | N         | N           | N              | N            | -           | -              | N           | N         | N               | N               | -         |
| Experience or training in qualitative research     | N         | N           | N              | N            | -           | -              | N           | Y         | N               | N               | -         |
| <b>Relationship with participants</b>              |           |             |                |              |             |                |             |           |                 |                 |           |
| Relationship established before study start        | N         | Y           | Y              | N            | -           | -              | Y           | Y         | N               | Y               | -         |
| <b>Participant selection</b>                       |           |             |                |              |             |                |             |           |                 |                 |           |
| Selection strategy                                 | Y         | N           | Y              | Y            | -           | -              | Y           | Y         | Y               | Y               | -         |
| Method of approach or recruitment                  | Y         | Y           | Y              | Y            | -           | -              | Y           | Y         | Y               | N               | -         |
| Sample size                                        | Y         | Y           | Y              | Y            | -           | -              | Y           | Y         | Y               | Y               | Y         |
| No. and/or reasons for nonparticipation            | Y         | N           | Y              | N            | -           | -              | Y           | Y         | N               | N               | -         |
| <b>Setting</b>                                     |           |             |                |              |             |                |             |           |                 |                 |           |
| Venue of data collection                           | Y         | Y           | Y              | Y            | Y           | -              | Y           | Y         | Y               | Y               | -         |
| Presence of nonparticipants (e.g., clinical staff) | N         | N           | N              | N            | -           | -              | N           | N         | N               | N               | -         |
| Description of sample                              | Y         | Y           | Y              | Y            | -           | -              | Y           | Y         | Y               | Y               | Y         |
| <b>Data collection</b>                             |           |             |                |              |             |                |             |           |                 |                 |           |
| Questions, prompts or topic guide                  | Y         | N           | N              | Y            | -           | -              | N           | Y         | N               | Y               | -         |
| Repeat interviews/observations                     | N         | N           | N              | N            | -           | -              | N           | N         | N               | N               | -         |
| Audio/visual recording                             | Y         | N           | N              | Y            | -           | -              | N           | Y         | N               | Y               | Y         |
| Field notes                                        | Y         | N           | N              | Y            | -           | -              | Y           | N         | Y               | N               | -         |
| Duration of data collection                        | Y         | N           | N              | Y            | -           | -              | N           | Y         | N               | Y               | -         |
| Translation and interpretation                     | NA        | NA          | NA             | NA           | -           | -              | NA          | Y         | NA              | NA              | -         |
| Data preparation and transcription                 | Y         | N           | Y              | Y            | -           | -              | N           | Y         | Y               | Y               | -         |
| Data (or theoretical) saturation                   | Y         | N           | N              | Y            | -           | -              | Y           | Y         | N               | Y               | -         |
| <b>Data Analysis</b>                               |           |             |                |              |             |                |             |           |                 |                 |           |
| Researcher/expert triangulation                    | N         | N           | Y              | Y            | -           | -              | N           | Y         | N               | Y               | -         |
| Translation                                        | NA        | NA          | NA             | NA           | -           | -              | NA          | N         | NA              | NA              | -         |

|                                                         |   |   |   |   |   |   |   |   |   |   |   |
|---------------------------------------------------------|---|---|---|---|---|---|---|---|---|---|---|
| Derivation of themes or findings                        | Y | N | Y | Y | - | - | Y | Y | Y | Y | - |
| Use of software                                         | Y | N | N | Y | Y | - | N | Y | N | N | - |
| Member checking                                         | N | N | Y | N | - | - | N | Y | N | N | - |
| <b>Reporting</b>                                        |   |   |   |   |   |   |   |   |   |   |   |
| Participant quotations or raw data provided             | Y | N | Y | Y | - | - | N | Y | Y | Y | Y |
| Range of depth of insight into participant perspectives | Y | N | N | Y | - | - | Y | Y | Y | N | - |

\*Abstract only; - not all COREQ domains could be assessed for publications reported as abstract only; Y: yes; N: no; NA: not applicable.

| Item                                               | Porteny 2021 and Porteny 2022 ^ | Rivera 2021 * | Schmidt 2021 * | Sousa 2021 | Sousa 2022 | Tsapepas 2021 | Tse 2021 | Valson 2022 | Van Zanten 2021 * | Varsi 2021 | Wang 2022 |
|----------------------------------------------------|---------------------------------|---------------|----------------|------------|------------|---------------|----------|-------------|-------------------|------------|-----------|
| <b>Personal Characteristics</b>                    |                                 |               |                |            |            |               |          |             |                   |            |           |
| Interviewer/facilitator identified                 | Y                               | -             | -              | Y          | Y          | Y             | Y        | Y           | -                 | N          | N         |
| Occupation of the interview/facilitator            | Y                               | -             | -              | Y          | Y          | Y             | N        | Y           | -                 | Y          | Y         |
| Experience or training in qualitative research     | Y                               | -             | -              | Y          | Y          | N             | N        | N           | -                 | N          | Y         |
| <b>Relationship with participants</b>              |                                 |               |                |            |            |               |          |             |                   |            |           |
| Relationship established before study start        | Y                               | -             | -              | Y          | Y          | N             | Y        | N           | -                 | Y          | Y         |
| <b>Participant selection</b>                       |                                 |               |                |            |            |               |          |             |                   |            |           |
| Selection strategy                                 | Y                               | -             | Y              | Y          | Y          | Y             | Y        | Y           | -                 | Y          | N         |
| Method of approach or recruitment                  | Y                               | -             | -              | Y          | Y          | Y             | Y        | Y           | -                 | Y          | Y         |
| Sample size                                        | Y                               | Y             | Y              | Y          | Y          | Y             | Y        | Y           | Y                 | Y          | Y         |
| No. and/or reasons for nonparticipation            | N                               | -             | -              | Y          | Y          | N             | N        | N           | -                 | Y          | N         |
| <b>Setting</b>                                     |                                 |               |                |            |            |               |          |             |                   |            |           |
| Venue of data collection                           | Y                               | -             | Y              | Y          | Y          | Y             | Y        | Y           | -                 | Y          | Y         |
| Presence of nonparticipants (e.g., clinical staff) | N                               | -             | -              | N          | N          | N             | N        | N           | -                 | N          | N         |
| Description of sample                              | Y                               | Y             | Y              | Y          | Y          | Y             | Y        | Y           | -                 | Y          | Y         |
| <b>Data collection</b>                             |                                 |               |                |            |            |               |          |             |                   |            |           |
| Questions, prompts or topic guide                  | Y                               | -             | -              | Y          | Y          | Y             | Y        | N           | -                 | Y          | N         |
| Repeat interviews/observations                     | N                               | -             | -              | N          | N          | N             | N        | N           | -                 | N          | N         |
| Audio/visual recording                             | Y                               | Y             | Y              | Y          | Y          | Y             | N        | Y           | -                 | Y          | Y         |
| Field notes                                        | N                               | -             | -              | N          | N          | N             | N        | N           | -                 | Y          | N         |
| Duration of data collection                        | Y                               | -             | -              | Y          | Y          | N             | N        | N           | -                 | Y          | N         |
| Translation and interpretation                     | NA                              | -             | -              | NA         | NA         | Y             | NA       | Y           | -                 | N          | NA        |
| Data preparation and transcription                 | Y                               | -             | -              | N          | N          | N             | Y        | N           | -                 | N          | Y         |
| Data (or theoretical) saturation                   | Y                               | -             | -              | N          | N          | N             | N        | Y           | -                 | N          | Y         |
| <b>Data Analysis</b>                               |                                 |               |                |            |            |               |          |             |                   |            |           |
| Researcher/expert triangulation                    | Y                               | -             | -              | Y          | Y          | N             | Y        | Y           | -                 | Y          | Y         |

|                                                         |    |   |   |    |    |   |    |   |   |   |    |
|---------------------------------------------------------|----|---|---|----|----|---|----|---|---|---|----|
| Translation                                             | NA | - | - | NA | NA | N | NA | Y | - | N | NA |
| Derivation of themes or findings                        | Y  | - | - | Y  | Y  | Y | Y  | Y | - | Y | Y  |
| Use of software                                         | Y  | - | - | N  | N  | N | N  | N | - | Y | Y  |
| Member checking                                         | Y  | - | - | N  | N  | N | N  | Y | - | Y | Y  |
| <b>Reporting</b>                                        |    |   |   |    |    |   |    |   |   |   |    |
| Participant quotations or raw data provided             | Y  | - | - | Y  | Y  | N | Y  | Y | - | Y | Y  |
| Range of depth of insight into participant perspectives | Y  | - | - | Y  | Y  | Y | Y  | Y | - | N | N  |

\*Abstract only; - not all COREQ domains could be assessed for publications reported as abstract only; Y: yes; N: no; NA: not applicable.

| Item                                              | Yoon 2023 |
|---------------------------------------------------|-----------|
| <b>Personal Characteristics</b>                   |           |
| Interviewer/facilitator identified                | Y         |
| Occupation of the interview/facilitator           | Y         |
| Experience or training in qualitative research    | Y         |
| <b>Relationship with participants</b>             |           |
| Relationship established before study start       | N         |
| <b>Participant selection</b>                      |           |
| Selection strategy                                | Y         |
| Method of approach or recruitment                 | Y         |
| Sample size                                       | Y         |
| No. and/or reasons for nonparticipation           | Y         |
| <b>Setting</b>                                    |           |
| Venue of data collection                          | Y         |
| Presence of nonparticipants (e.g. clinical staff) | N         |
| Description of sample                             | Y         |
| <b>Data collection</b>                            |           |
| Questions, prompts or topic guide                 | Y         |
| Repeat interviews/observations                    | N         |
| Audio/visual recording                            | Y         |
| Field notes                                       | Y         |
| Duration of data collection                       | Y         |
| Translation and interpretation                    | Y         |
| Data preparation and transcription                | Y         |
| Data (or theoretical) saturation                  | Y         |
| <b>Data Analysis</b>                              |           |
| Researcher/expert triangulation                   | Y         |
| Translation                                       | Y         |
| Derivation of themes or findings                  | Y         |
| Use of software                                   | Y         |
| Member checking                                   | Y         |
| <b>Reporting</b>                                  |           |
| Participant quotations or raw data provided       | Y         |

---

|                                                         |   |
|---------------------------------------------------------|---|
| Range of depth of insight into participant perspectives | Y |
|---------------------------------------------------------|---|

---

Y: yes; N: no; NA: not applicable.

**Table S4. Reporting of themes according to CKD treatment stage**

| Theme                                              | CKD treatment stage |          |                              |
|----------------------------------------------------|---------------------|----------|------------------------------|
|                                                    | Non-dialysis        | Dialysis | Kidney transplant recipients |
| <b>Exacerbating vulnerability and distress</b>     |                     |          |                              |
| Looming threat of Covid-19 infection               | ●                   | ●        | ●                            |
| Intensifying isolation                             | ●                   | ●        | ●                            |
| Aggravating pressure on families                   | ●                   | ●        | ●                            |
| <b>Uncertainty in accessing healthcare</b>         |                     |          |                              |
| Overwhelmed by disruption of care                  | ●                   | ●        | ●                            |
| Confused by lack of reliable information           | ●                   | ●        | ●                            |
| Challenged by adapting to telehealth               | ●                   | ●        | ●                            |
| Skeptical about vaccine efficacy and safety        |                     | ●        | ●                            |
| <b>Coping with self-management</b>                 |                     |          |                              |
| Waning fitness due to decreasing physical activity | ●                   | ●        |                              |
| Diminishing ability to manage diet                 | ●                   | ●        |                              |
| Difficulty managing fluid restrictions             | ●                   | ●        |                              |
| Minimized burden with telehealth                   | ●                   | ●        | ●                            |
| Motivating confidence and autonomy                 | ●                   | ●        | ●                            |
| <b>Strengthening sense of safety and support</b>   |                     |          |                              |
| Protection from lockdown restrictions              | ●                   | ●        | ●                            |
| Increasing trust in care                           | ●                   | ●        | ●                            |
| Strengthened family connection                     | ●                   | ●        | ●                            |

CKD: chronic kidney disease.

## References

1. Antoun J, Brown D, Jones DJW, et al. Understanding the Impact of Initial COVID-19 Restrictions on Physical Activity, Wellbeing and Quality of Life in Shielding Adults with End-Stage Renal Disease in the United Kingdom Dialysing at Home versus In-Centre and Their Experiences with Telemedicine. *Int J Environ Res Public Health*. 2021 Mar 18;18(6):3144. <https://doi.org/0.3390/ijerph18063144>.
2. Guha C, Tong A, Baumgart A, et al. Suspension and resumption of kidney transplant programmes during the COVID-19 pandemic: perspectives from patients, caregivers and potential living donors - a qualitative study. *Transpl Int*. 2020 Nov;33(11):1481-1490. <https://doi.org/10.1111/tri.13697>.
3. Huuskes BM, Scholes-Robertson N, Guha C, et al. Kidney transplant recipient perspectives on telehealth during the COVID-19 pandemic. *Transpl Int*. 2021 Aug;34(8):1517-1529. <https://doi.org/10.1111/tri.13934>.
4. Lunney M, Thomas C, Rabi D, Bello AK, Tonelli M. Video Visits Using the Zoom for Healthcare Platform for People Receiving Maintenance Haemodialysis and Nephrologists: A Feasibility Study in Alberta, Canada. *Can J Kidney Health Dis*. 2021 Apr 26;8: 20543581211008698. <https://doi.org/10.1177/20543581211008698>.
5. McKeaveney C, Noble H, Carswell C, Johnston W, Reid J. Psychosocial Well-Being of Patients with Kidney Failure Receiving Haemodialysis during a Pandemic: A Survey. *Healthcare (Basel)*. 2021 Aug 23;9(8):1087. doi:10.3390/healthcare9081087.
6. Sousa H, Frontini R, Ribeiro O, et al. Caring for patients with end-stage renal disease during COVID-19 lockdown: What (additional) challenges to family caregivers? *Scand J Caring Sci*. 2022 Mar; 36(1):215-224. <https://doi.org/10.1111/scs.12980>
7. Sousa H, Ribeiro O, Costa E, et al. Being on haemodialysis during the COVID-19 outbreak: A mixed-methods' study exploring the impacts on dialysis adequacy, analytical



data, and patients' experiences. *Semin Dial*. 2021 Jan;34(1):66-76.

<https://doi.org/10.1111/sdi.12914>.

8. Tsapepas D, Husain S, King KL, Burgos Y, Cohen DJ, Mohan S. Perspectives on COVID-19 vaccination among kidney and pancreas transplant recipients living in New York City. *Am J Health Syst Pharm*. 2021 Nov 9; 78(22):2040-2045. doi:10.1093/ajhp/zxab272.

9. Tse Y, Darlington AE, Tyerman K, et al. COVID-19: experiences of lockdown and support needs in children and young adults with kidney conditions. *Pediatr Nephrol*. 2021 Sep;36(9):2797-2810. doi:10.1007/s00467-021-5041-8.

10. Yoon S, Hoe PS, Chan A, et al. Impact of COVID-19 on perceived wellbeing, self-management and views of novel modalities of care among medically vulnerable patients in Singapore. *Chronic Illn*. 2023 Jun 19(2):314-326. doi:17423953211067458.

11. Malo MF, Affdal A, Blum D, et al. Lived Experiences of Patients Receiving Hemodialysis during the COVID-19 Pandemic: A Qualitative Study from the Quebec Renal Network. *Kidney360*. 2022 Apr 25;3(6):1057-1064. doi:10.34067/KID.0000182022.

12. Porteny T, Gonzales KM, Aufort KE, et al. Treatment Decision Making for Older Kidney Patients during COVID-19. *Clin J Am Soc Nephrol*. 2022 Jul;17(7):957-965. doi:10.2215/CJN.13241021.

13. Valson A, George R, Lalwani M, et al. Impact of the lockdown on patients receiving maintenance hemodialysis at a tertiary care facility in Southern India - A mixed-methods approach. *Indian J Nephrol*. 2022 May-Jun;32(3):256-261. doi:10.4103/ijn.IJN\_561\_20.

14. Figueiredo D, Sousa H, Amado L, Miranda V, Costa E, Paul C, et al. Pos-793 Undergoing Hemodialysis during Covid-19 Lockdown: Exploring Patients' and Family Caregivers' Experiences. *Kidney Int Reports*. 2021;6(4 Suppl):S344-S345.

<https://dx.doi.org/10.1016/j.ekir.2021.03.826>.

15. Arevalo Iraheta YA, Murillo AL, Ho EW, et al. Stressors and Information-Seeking by Dialysis and Transplant Patients During COVID-19, Reported on a Telephone Hotline: A Mixed-Methods Study. *Kidney Med.* 2022 Jul;4(7):100479. doi:10.1016/j.xkme.2022.100479.
16. Beaudet M, Ravensbergen L, DeWeese J, et al. Accessing hemodialysis clinics during the COVID-19 pandemic. *Transp Res Interdiscip Perspect.* 2022 Mar;13:100533. doi:10.1016/j.trip.2021.100533.
17. Varsi CS, Aud-Eldrid; Børø Sund, Elin; Solberg Nes L. Video as an alternative to in-person consultations in outpatient renal transplant recipient follow-up: a qualitative study. *BMC Nephrol.* 2021 Mar;22(1): 105. doi:10.1186/s12882-021-02284-3.
18. Wang CS, Doma R, Westbrook AL, et al. Vaccine Attitudes and COVID-19 Vaccine Intention Among Parents of Children With Kidney Disease or Primary Hypertension. *Am J Kidney Dis.* 2023 Jan; 81(1); 25-35.e1. doi:10.1053/j.ajkd.2022.04.011.
19. Haokip N, Rathore P, Kumar S, et al. Psychosocial Burdens of a Renal Transplant Recipient with COVID-19. *Indian J Palliat Care.* 2020 June;26(Suppl 1):S168-s169. doi:10.4103/IJPC.IJPC\_169\_20.
20. Bonenkamp AA, Druiventak TA, van Eck van der Sluijs A, et al. The Impact of COVID-19 on the mental health of dialysis patients. *J Nephrol.* 2021 Apr;34(2):337-344. doi:10.1007/s40620-021-01005-1.
21. Heyck Lee S, Ramondino S, Gallo K, Moist LM. A Quantitative and Qualitative Study on Patient and Physician Perceptions of Nephrology Telephone Consultation During COVID-19. *Can J Kidney Health Dis.* 2022 Jan 5;9:20543581211066720. doi:10.1177/20543581211066720.

22. McKeaveney C, Noble H, Courtney AE, et al. Dialysis, Distress, and Difficult Conversations: Living with a Kidney Transplant. *Healthcare (Basel)*. 2022 Jun 23;10(7):1177. doi:10.3390/healthcare10071177.
23. Schmidt IM, Stern LD, Farr M, Nguyen NH, Waikar SS, Shoheit M. Stigma syndemics and ESKD in disenfranchised urban communities fighting COVID-19. *J Am Soc Nephrol*. 2021;32:83-84.
24. Cuevas-Budhart MA, Celaya Pineda IX, Perez Moran D, Trejo Villeda MA, Gomez Del Pulgar M, Rodriguez Zamora MC, et al. Patient experience in automated peritoneal dialysis with telemedicine monitoring during the COVID-19 pandemic in Mexico: Qualitative study. *Nurs Open*. 2023 Feb;10(2):1092-1101. doi:10.1002/nop2.1377.
25. Danton IKR, Elander J, Louth C, Selby NM, Taal MW, Stalker C, Mitchell K. 'I didn't have any option': experiences of people receiving in-centre haemodialysis during the COVID-19 pandemic. *J Kidney Care*. 2022;7(3):112-9.
26. Van Zanten R, Peelen D, Laging M, et al. Impact of the covid-19 pandemic on daily lives, emotions and behaviours of kidney transplant recipients. *Transpl Int*. 2021;34(Suppl 1):114-115. <https://dx.doi.org/10.1111/tri.13944>.
27. Fortin MC, Malo MFA, Affdal AO, et al. Impact of COVID-19 on hemodialysis patients: The Quebec renal network (QRN) COVID-19 study. *J Am Soc Nephrol*. 2021;32:771. <https://dx.doi.org/10.1681/asn.2021020208>.
28. Gordon EJ, Uriarte JJ, McLagan AN, et al. Barriers to Completing the Transplant Evaluation Process: A Mixed- Methods Study. *Am J Transplant*. 2022;22(Suppl 3):1046. <https://dx.doi.org/10.1111/ajt.17073>.
29. Arevalo Iraheta YA, Murillo AL, Wood EH, Advani SM, Pines R, Waterman AD. Challenges and stressors of covid-19 kidney and transplant patients: A mixed methods study. *Am J Transplant*. 2021;21(Suppl 4):470. <https://dx.doi.org/10.1111/ajt.16847>.

30. Ng JH, Halinski C, Nair D, Diefenbach MA. Barriers and facilitators to emotional well-being and healthcare engagement in COVID-19: A qualitative study among patients with kidney disease and their caregivers. *J Am Soc Nephrol*. 2021;32:85.
31. Porteny T, Koch-Weser S, Rifkin DE, et al. Decision-making during uncertain times: A qualitative study of kidney patients, care partners, and nephrologists during the COVID-19 pandemic. *J Am Soc Nephrol*. 2021;32:73.
32. Rivera E, Clark-Cutaia MN, Schrauben SJ, et al. Treatment adherence support and relationships with CKD providers: A qualitative analysis. *J Am Soc Nephrol*. 2021;32:735.
33. Davis MJ, Alqarni KA, McGrath-Chong ME, Bargman JM, Chan CT. Anxiety and psychosocial impact during coronavirus disease 2019 in home dialysis patients. *Nephrology*. 2022 Feb;27(2):190-194. doi:10.1111/nep.13978.
34. John MO, Gummidi B, Jha V. Pos-330 Risk Perceptions About Covid-19 among a Cohort of Chronic Kidney Disease Patients in Rural India. *Kidney Int Reports*. 2021;6(Suppl 4):S143-S144. <https://dx.doi.org/10.1016/j.ekir.2021.03.346>.
